# Supplementary material for: Cytomegalovirus Diseases of the Gastrointestinal Tract
Source: MDPI journal article supplement (doi:10.3390/v14020352), 2022-02-08
Supplement: s1 [file s1]

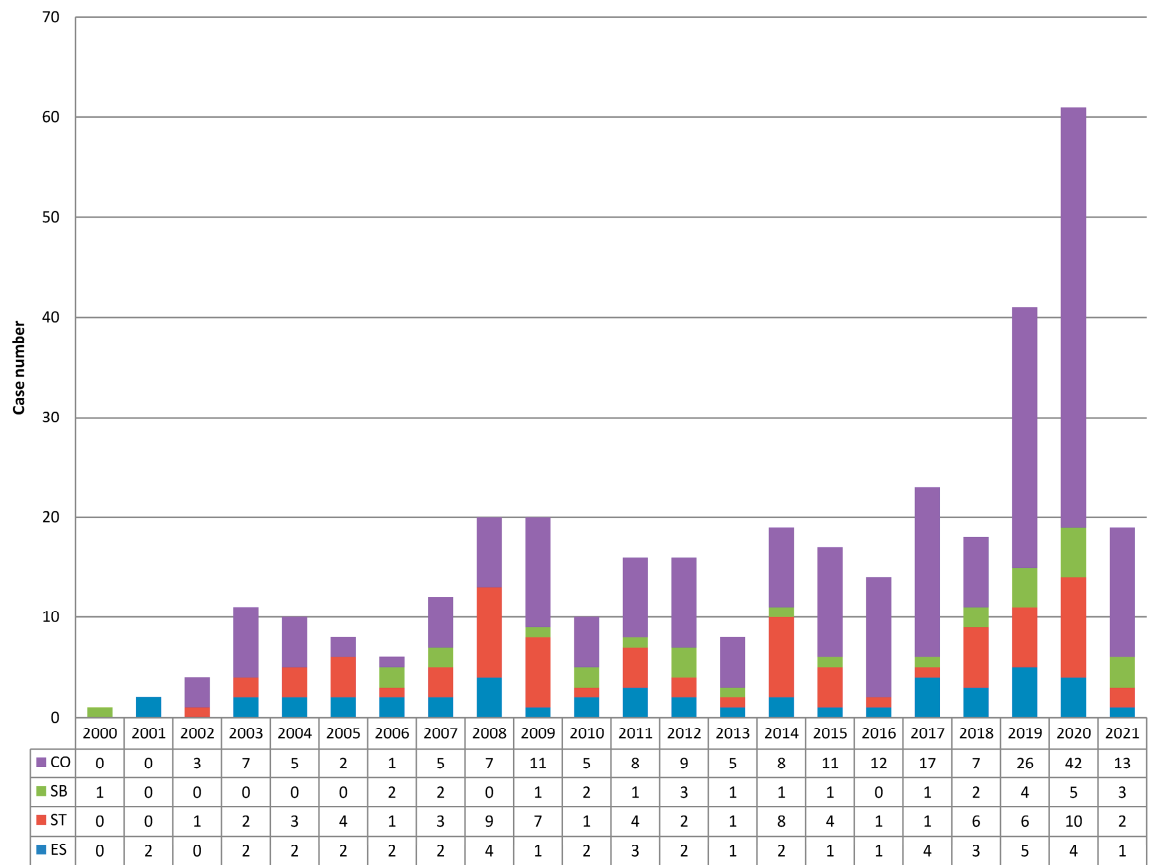

**Figure S1.** Trends of annual case numbers of cytomegalovirus gastrointestinal diseases.

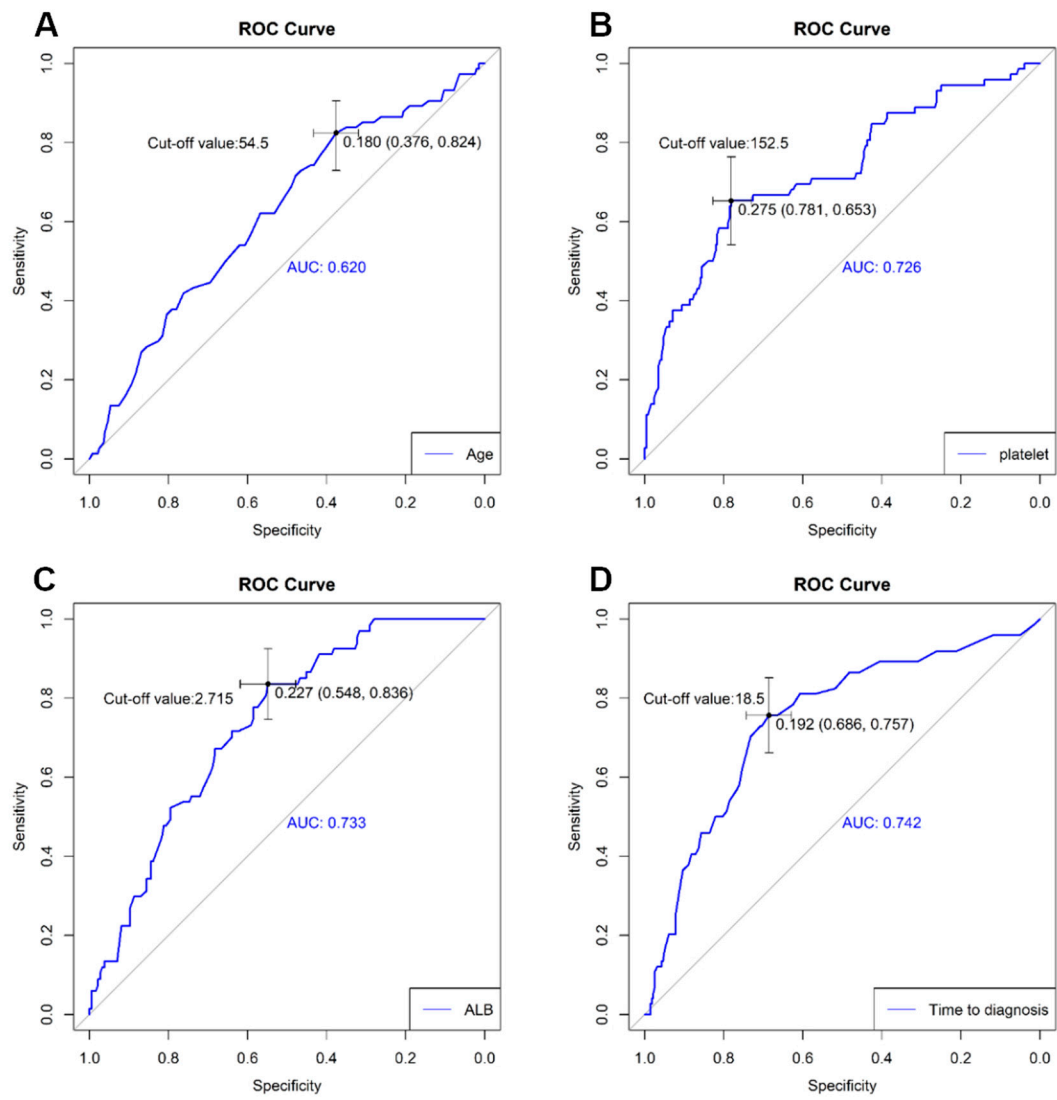

**Figure S2.** Receiver operating characteristic analysis of cut-off values for continuous parameters, (A) age; (B) platelet, (C) albumin, (D) time-to-diagnosis.
